# Supplementary material for: Synthesis and photophysical properties of ruthenocene-[60]fullerene dyads
Source: Royal Society of Chemistry journal article supplement (doi:10.1039/b509221c), 2005-11-11
Supplement: b509221c.pdf [file b509221c.pdf]

## Electronic Supplementary Information (ESI)

### Synthesis and Photophysical Properties of Ruthenocene-[60]Fullerene Dyads

Juan José Oviedo,<sup>a</sup> Pilar de la Cruz,<sup>a</sup> Laura Pérez,<sup>a</sup> Javier Garín,<sup>b</sup> Jesús Orduna,<sup>b</sup>  
M. E. El-Khouly,<sup>c</sup> Yasuyuki, Araki,<sup>c</sup> Fernando Langa,<sup>a,\*</sup> and Osamu Ito<sup>c,\*</sup>

<sup>a</sup> *Facultad de Ciencias del Medio Ambiente, Universidad de Castilla-La Mancha, 45071, Toledo, Spain*

<sup>b</sup> *Departamento de Química Orgánica, ICMA, Universidad de Zaragoza-CSIC, E-50009 Zaragoza, Spain*

<sup>c</sup> *Institute of Multidisciplinary Research for Advanced Materials, Tohoku University, Katahira, Aoba-ku, Sendai, 980-8577*

<sup>c</sup> *Department of Chemistry, Graduate School of Science, Tohoku University, Sendai, Japan*

**ESI 2** <sup>1</sup>H-NMR spectrum of compound **2**

**ESI 3** <sup>13</sup>C-NMR spectrum of compound **2**

**ESI 4** <sup>1</sup>H-NMR spectrum of compound **3**

**ESI 5** <sup>13</sup>C-NMR spectrum of compound **3**

**ESI 6** MS MALDI-TOF spectrum of compound **3**

**ESI 7** <sup>1</sup>H-NMR spectrum of compound **4**

**ESI 8** <sup>13</sup>C-NMR spectrum of compound **4**

**ESI 9** MS MALDI-TOF spectrum of compound **4**

**ESI 10** (a) Time resolved spectra of **5** in toluene; (b) Fluorescence time profile of **5** at 700 nm in toluene.  $\lambda_{\text{ex}} = 400$  nm

**ESI11** Transient absorption spectra obtained by 532 nm laser light of **5** in PhCN obtained by 532 nm laser light photolysis.

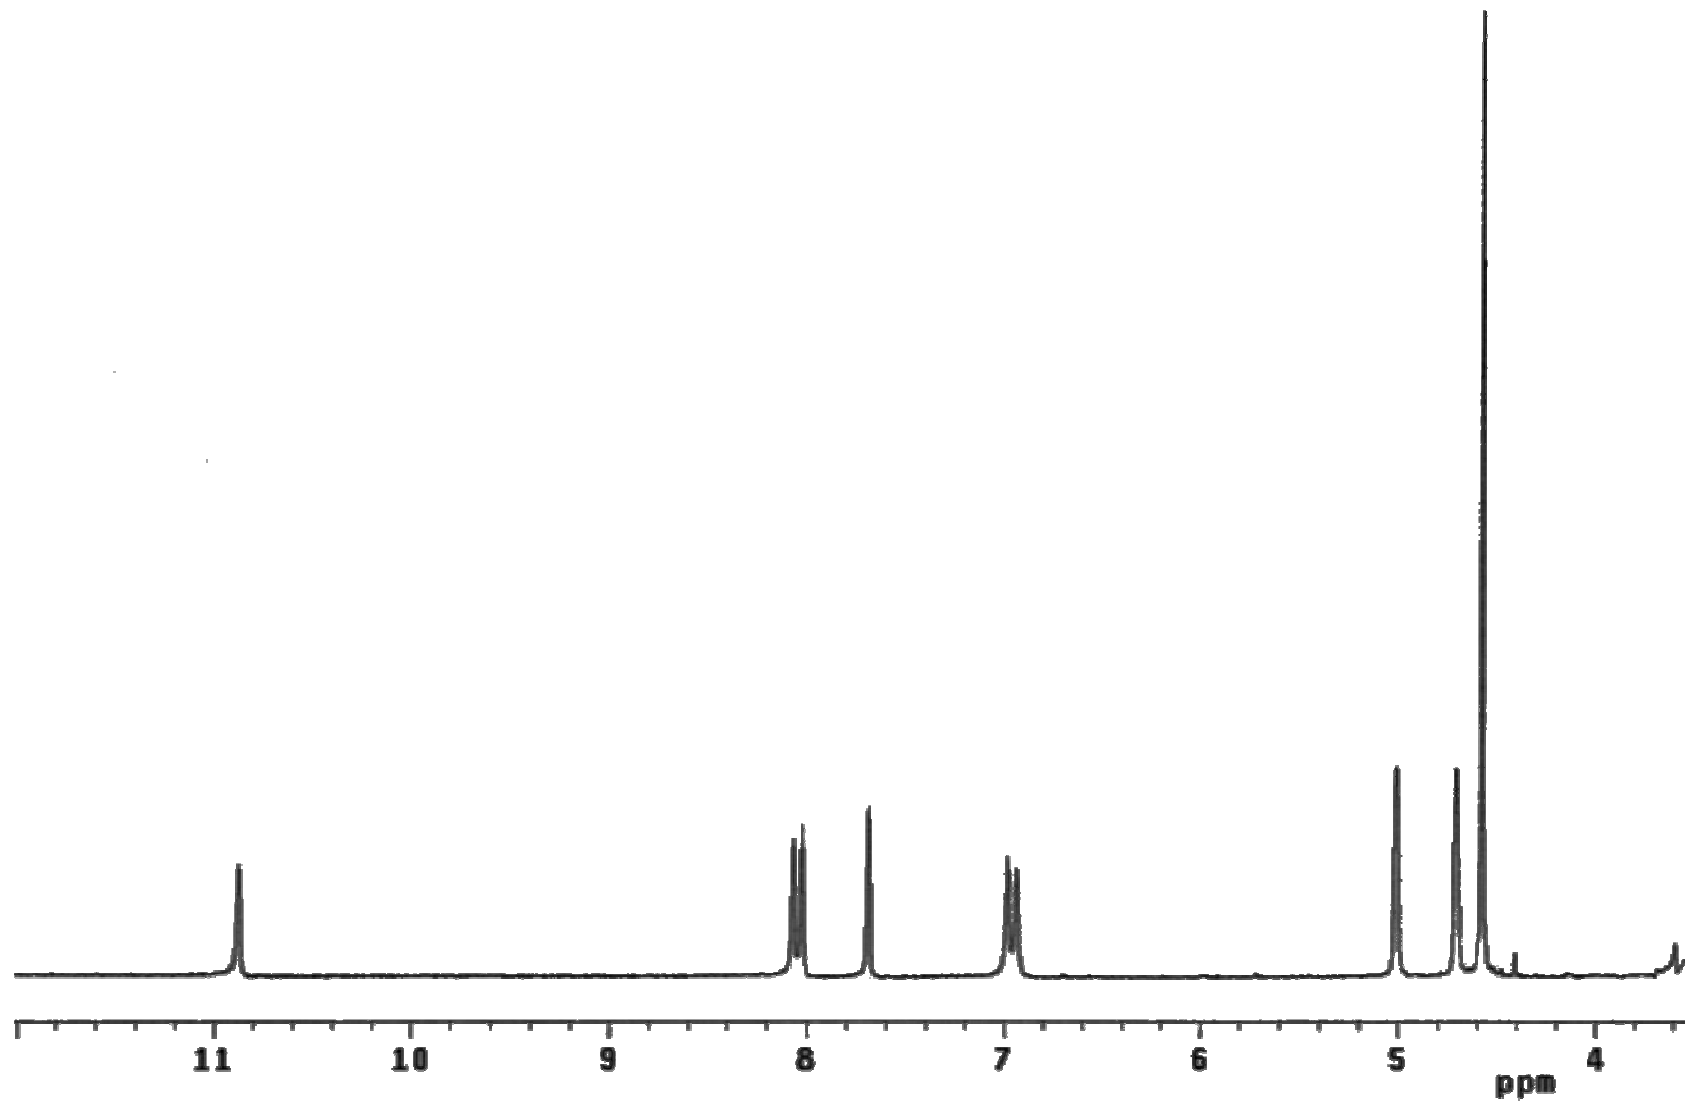

$^1\text{H}$  NMR of compound 2

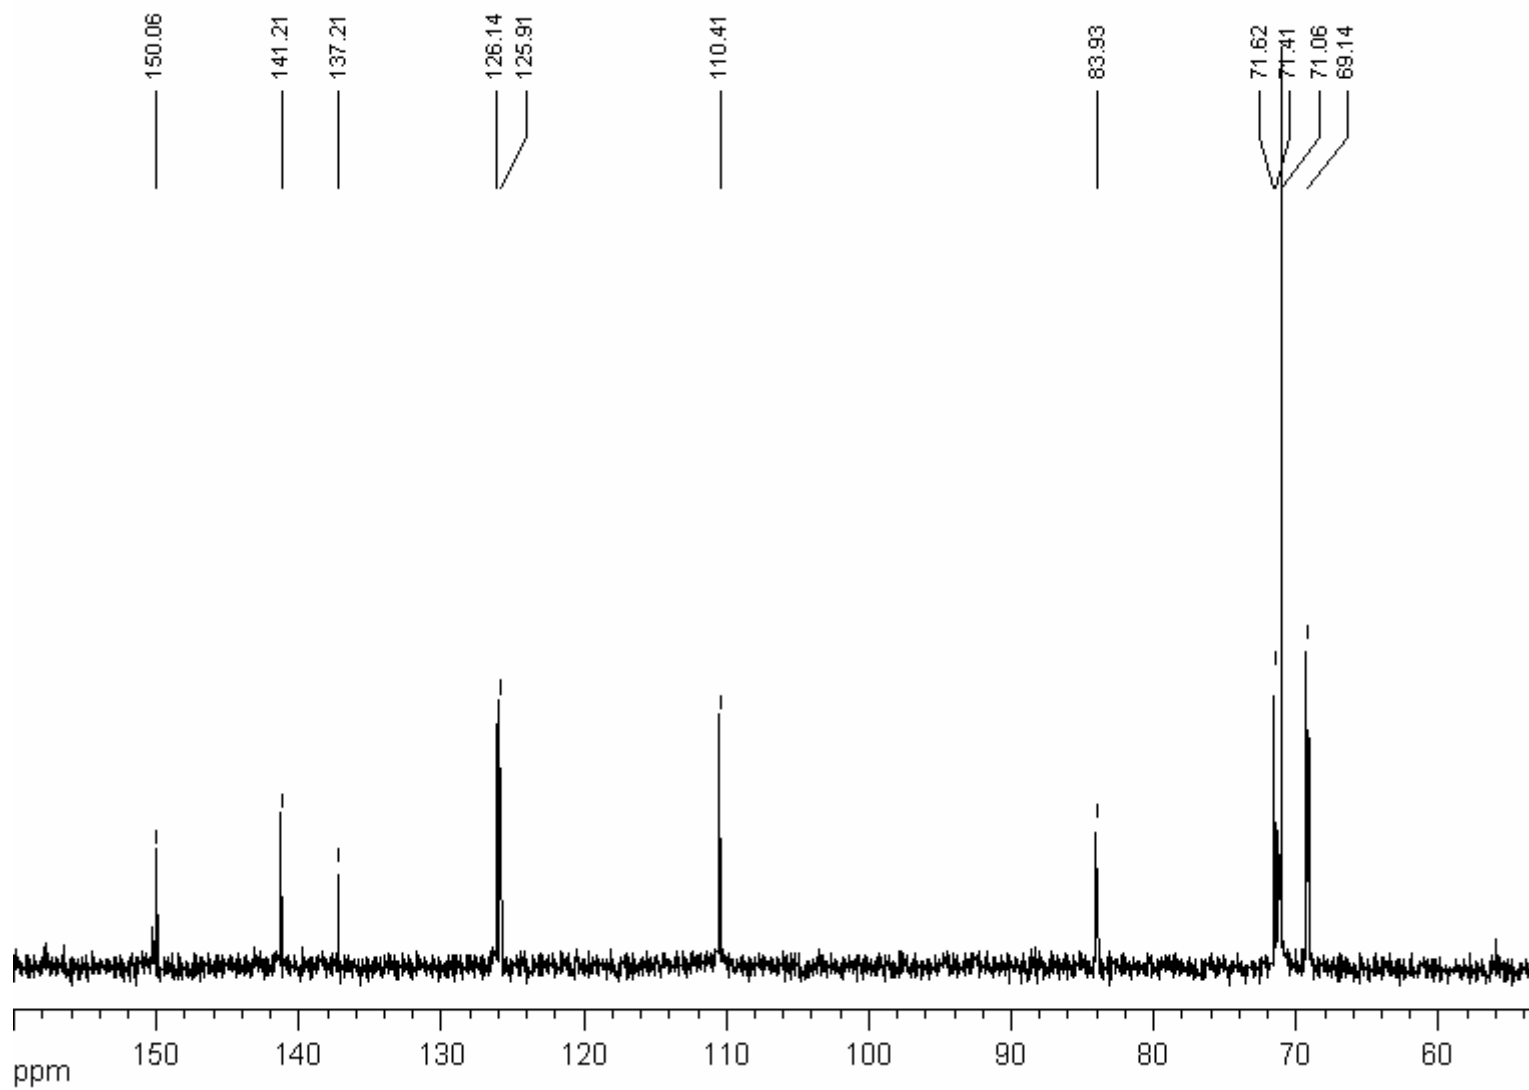

$^{13}\text{C}$  NMR of compound 2

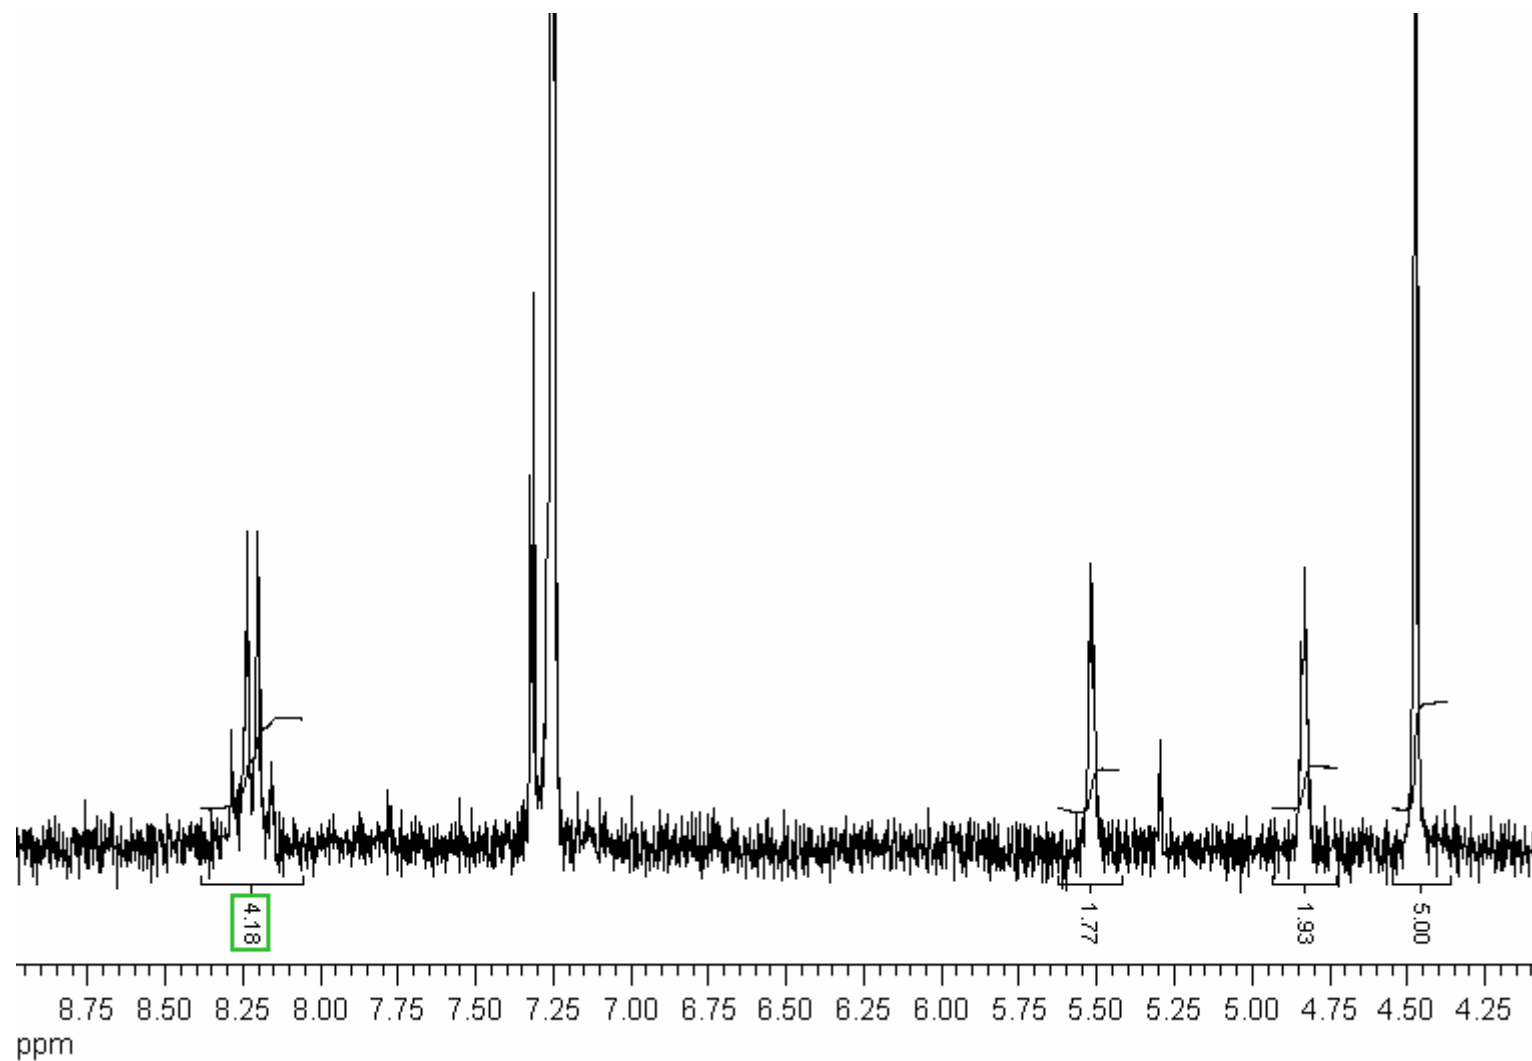

$^1\text{H}$  NMR of compound 3

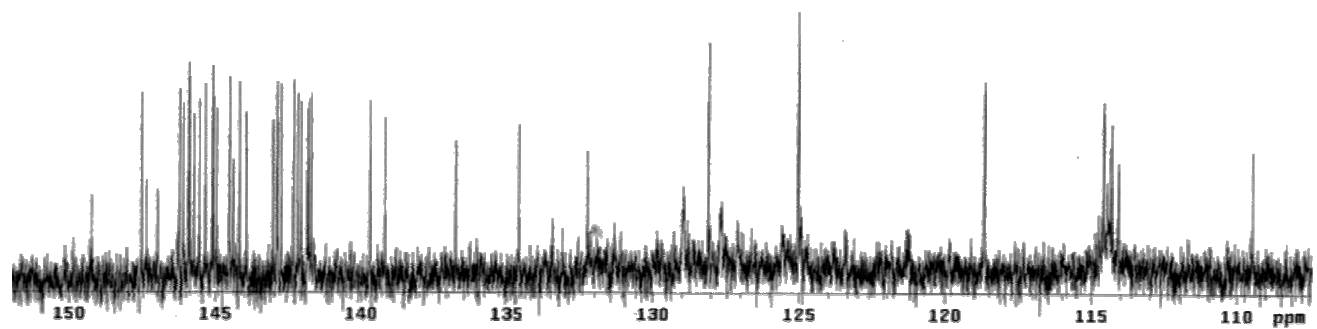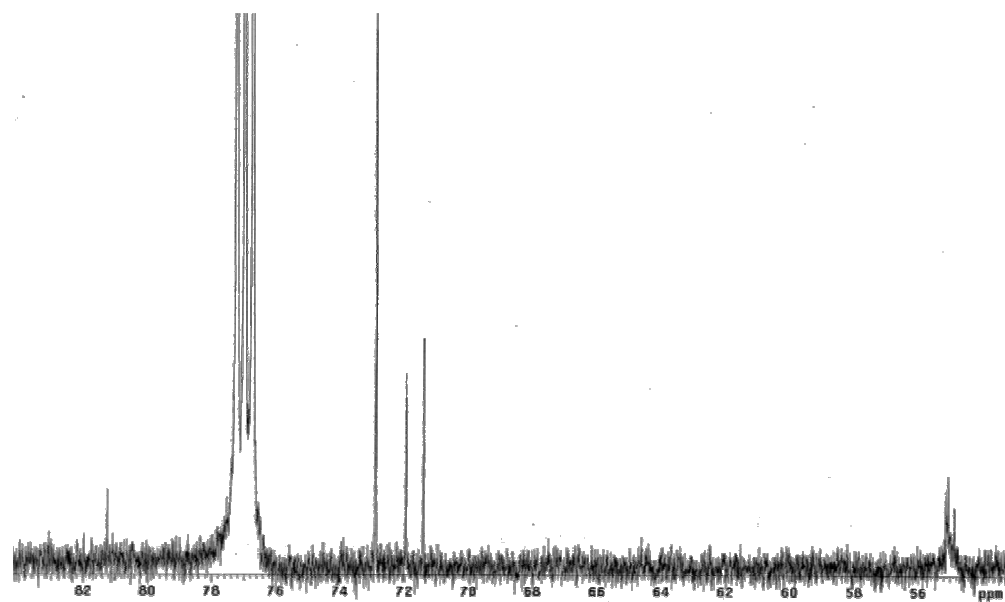

$^{13}\text{C}$  NMR of compound 3

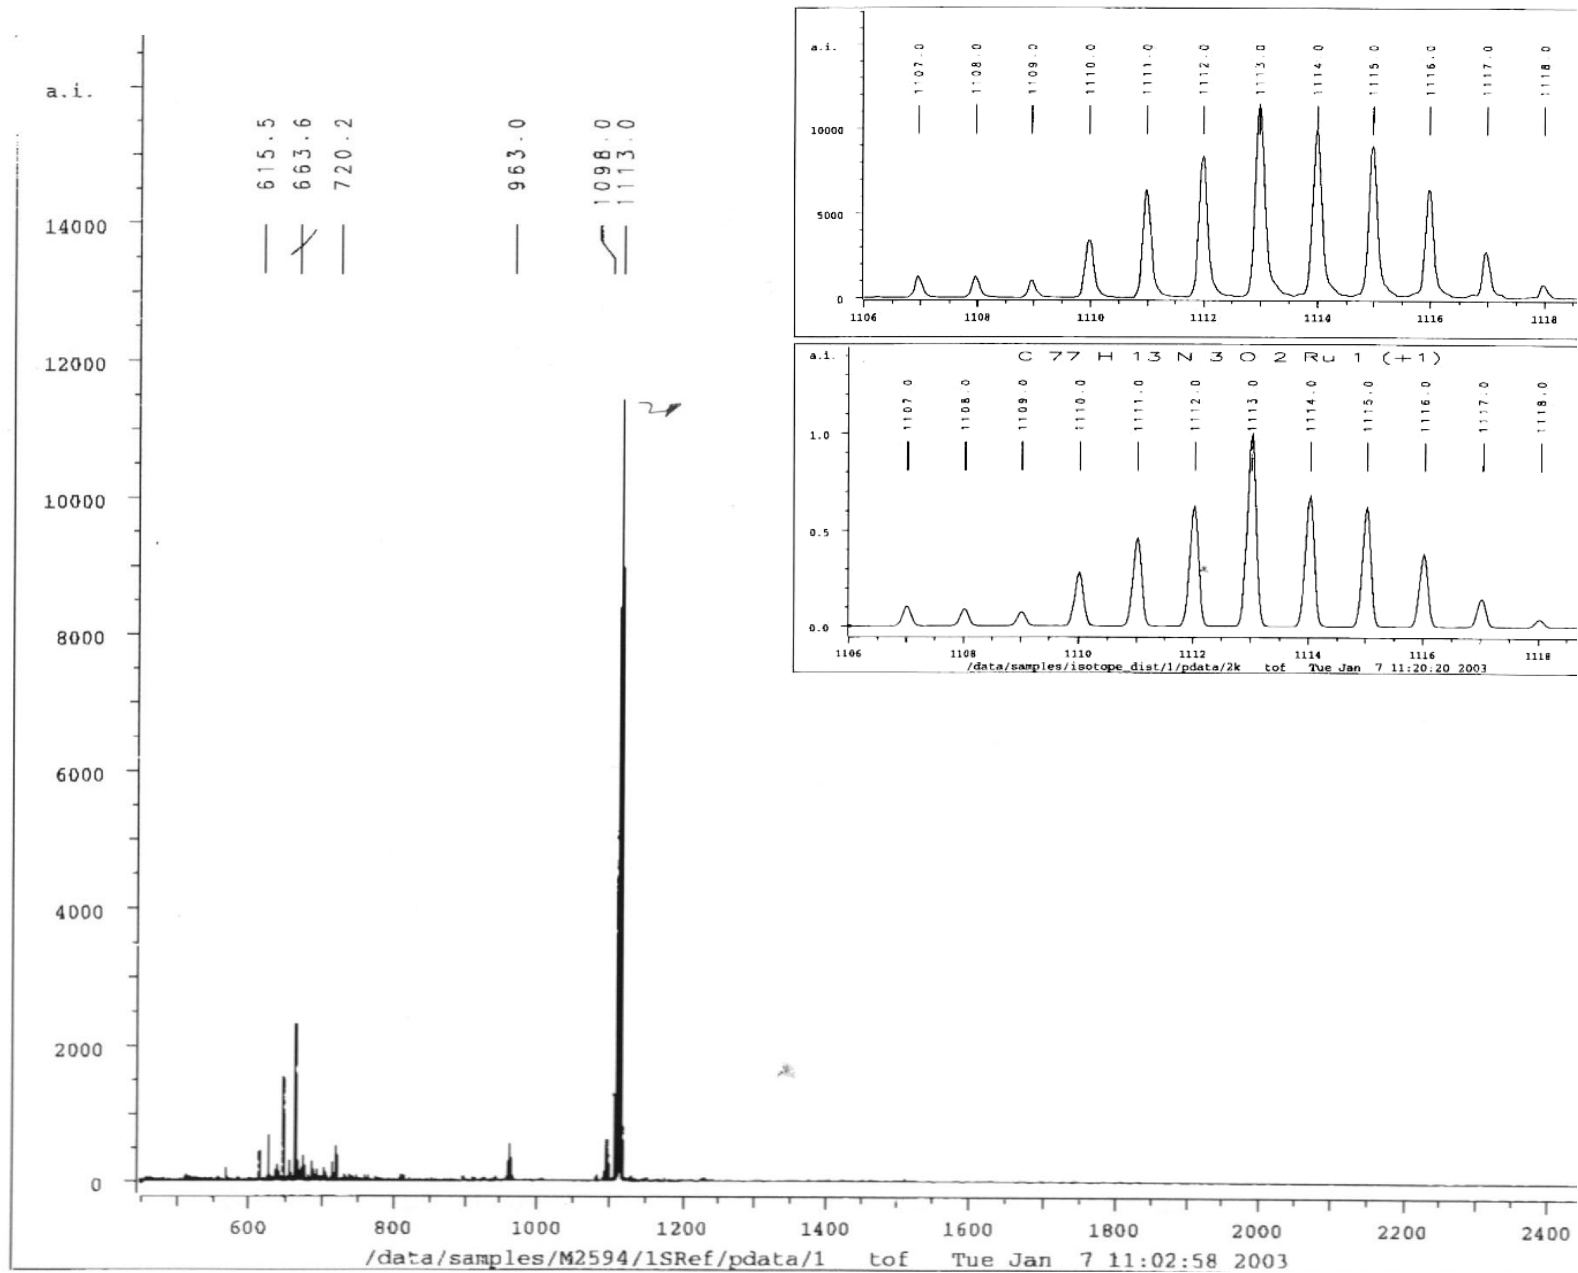

MS MALDI-TOF spectrum of compound 3

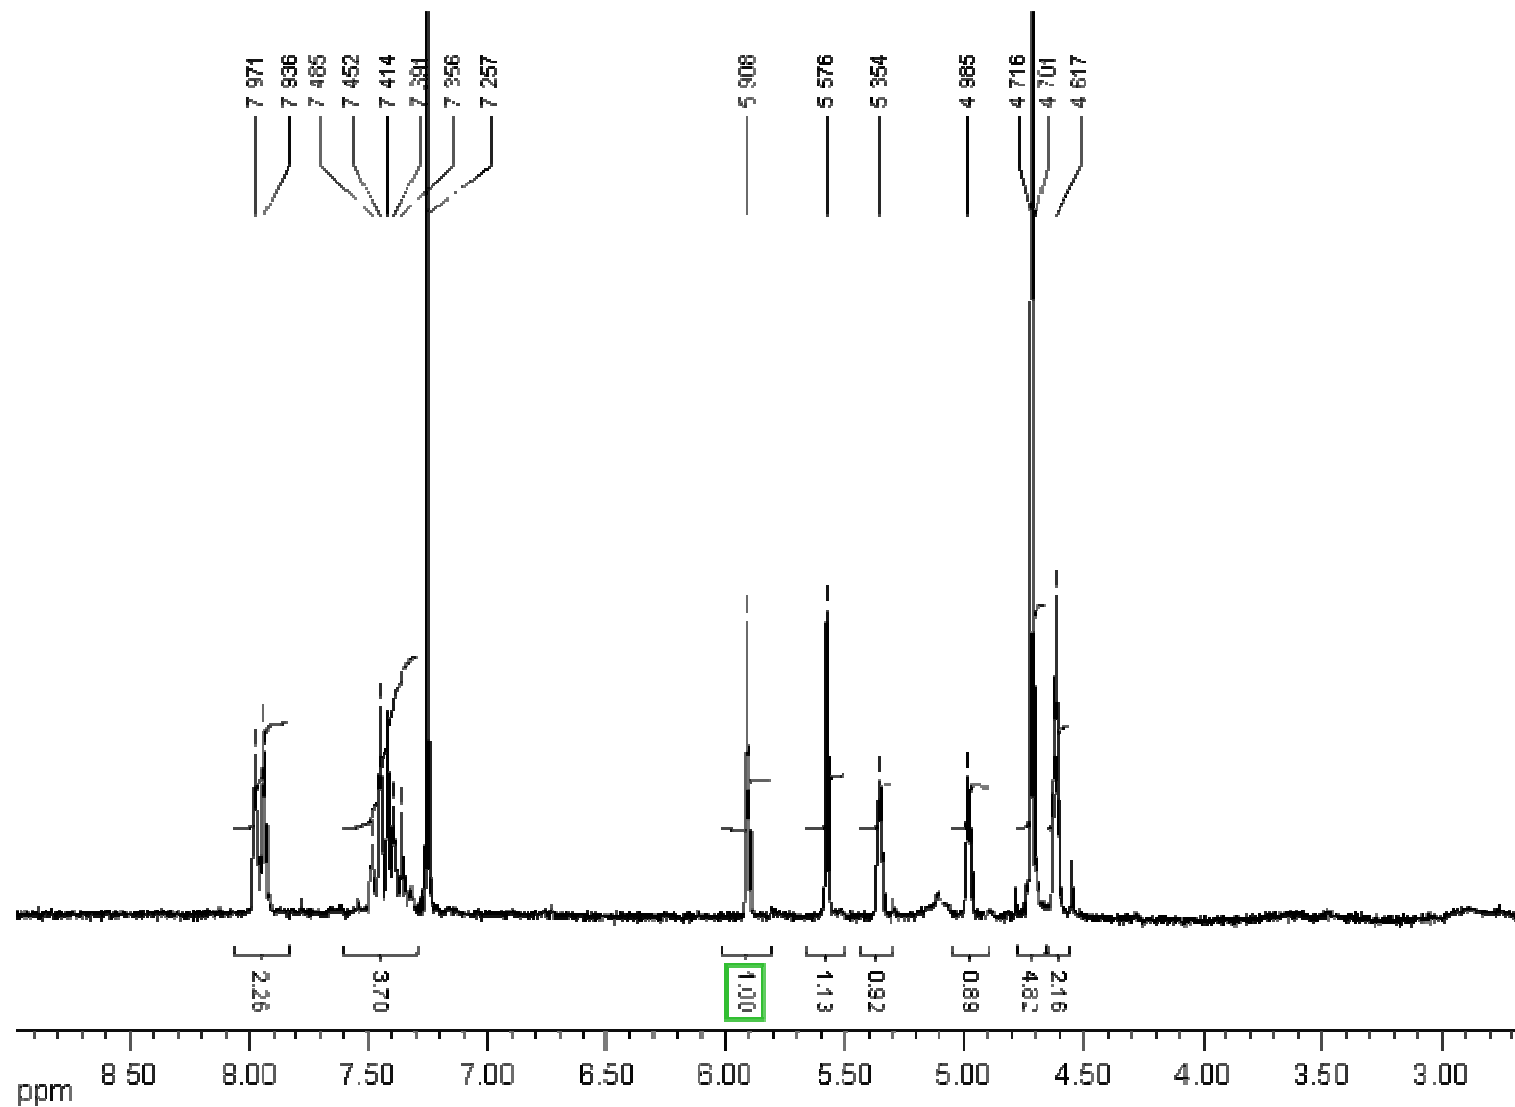

<sup>1</sup>H NMR of compound 4

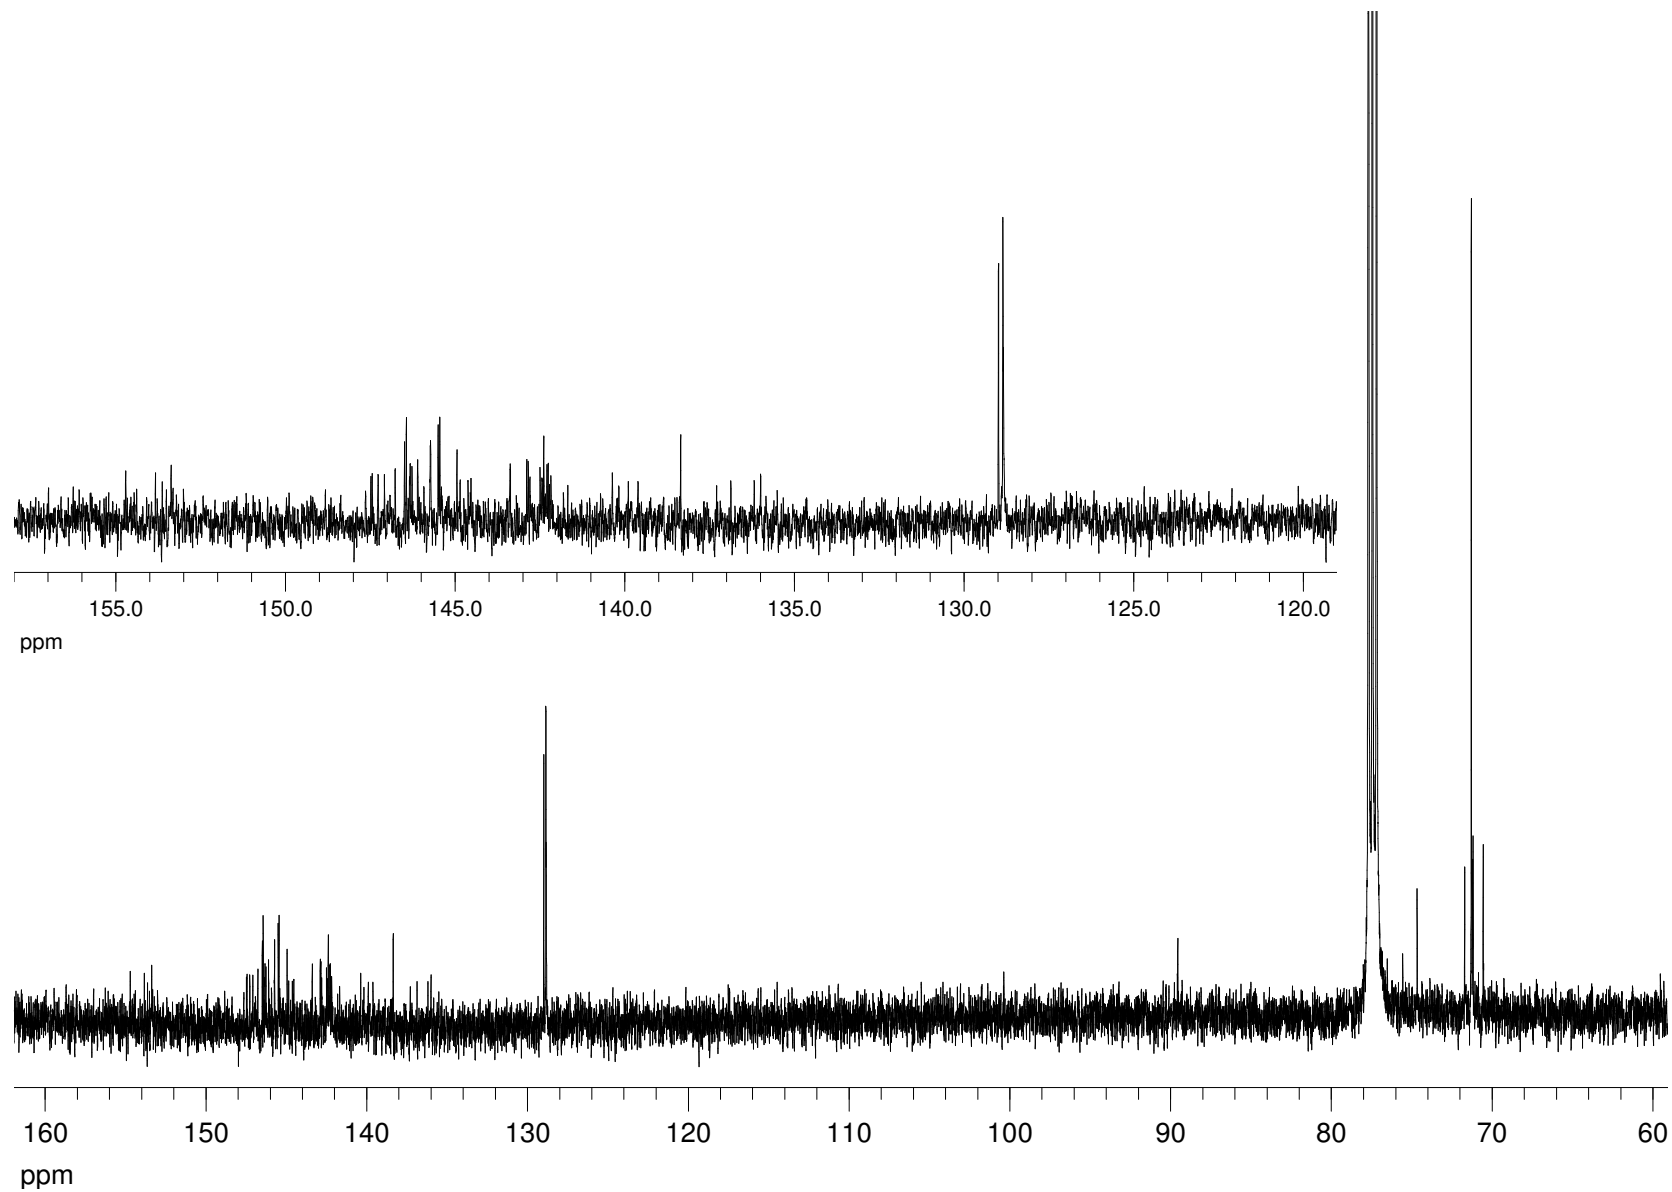

$^{13}\text{C}$  NMR spectrum of compound **4**



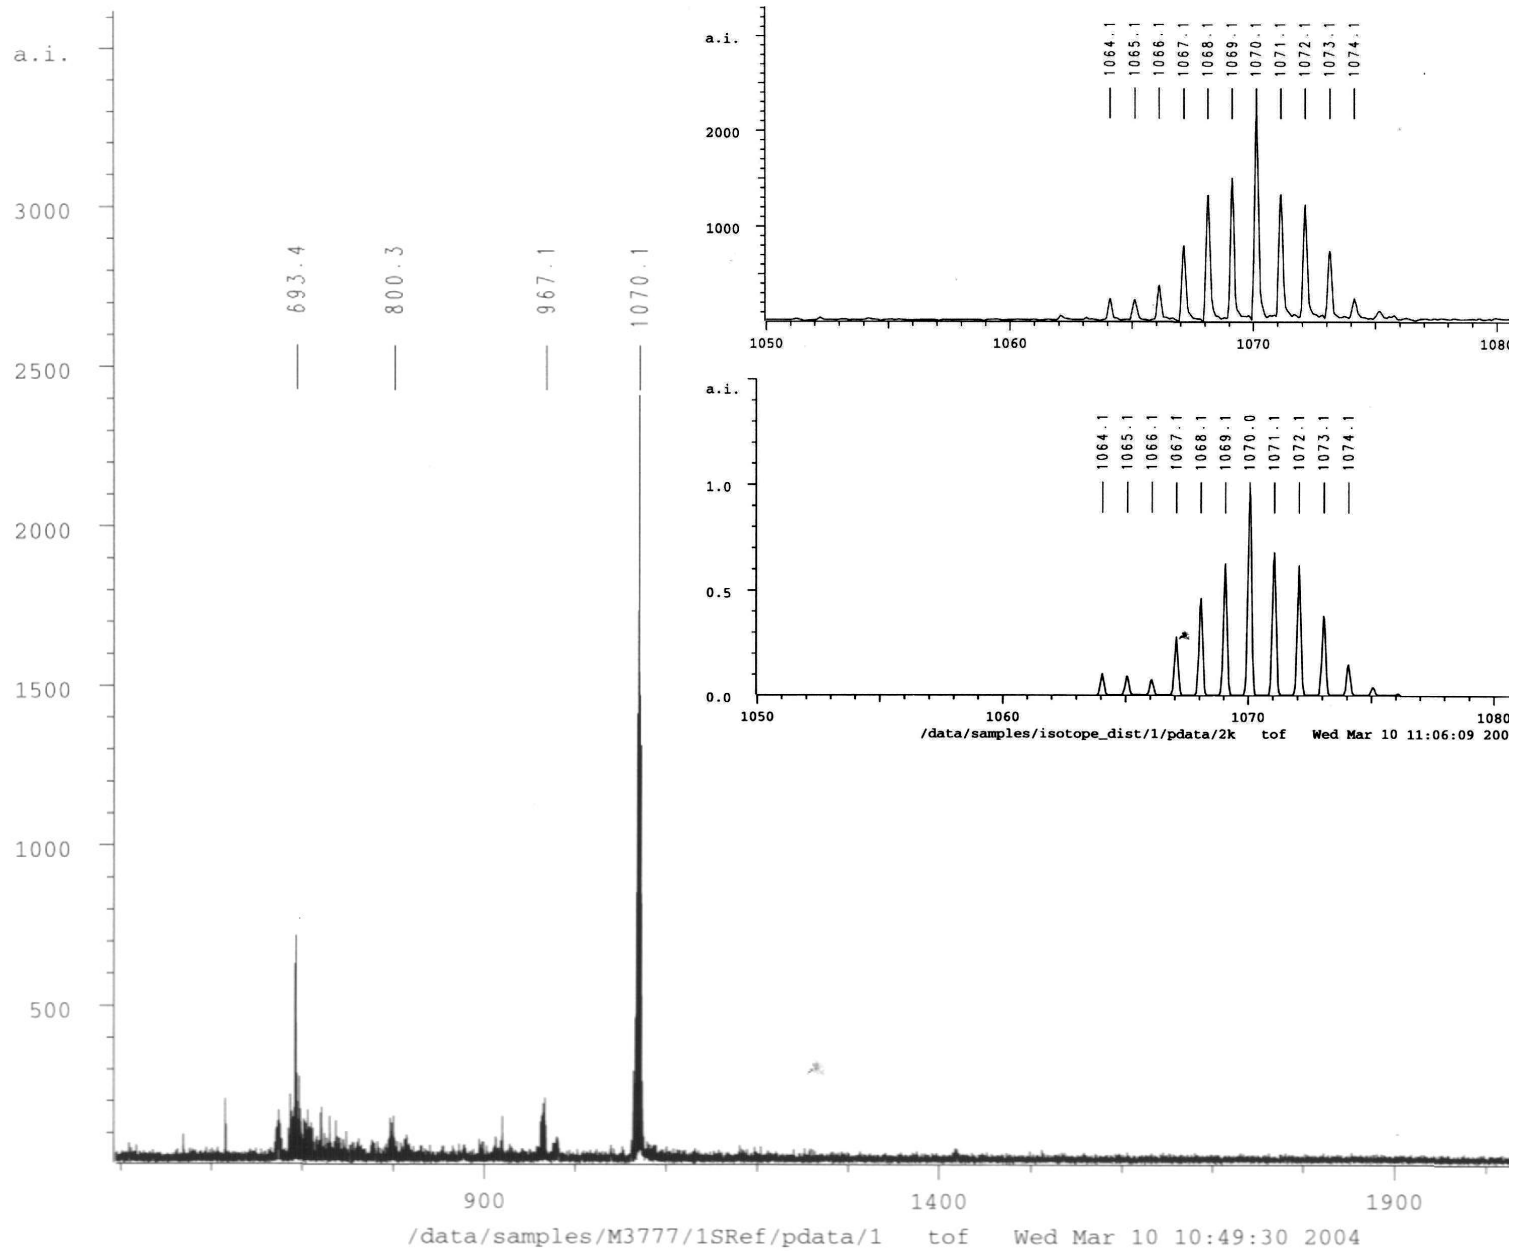

MS MALDI-TOF spectrum of compound 4

ESI9

a)

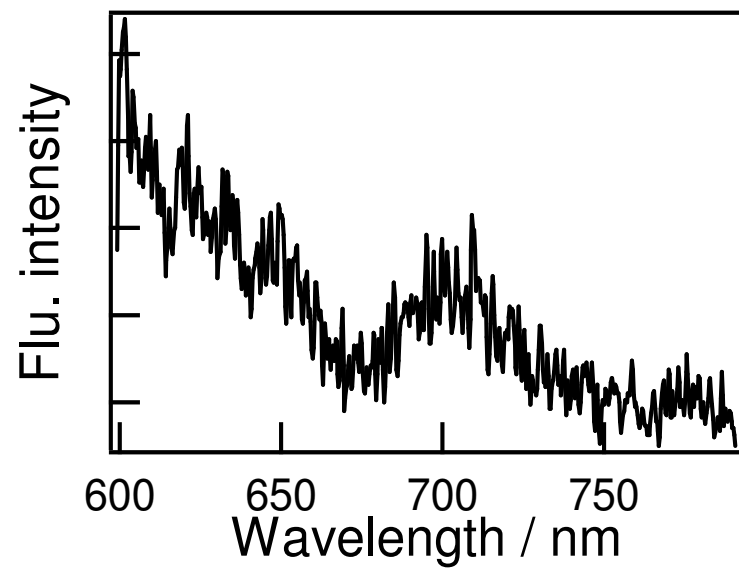

b)

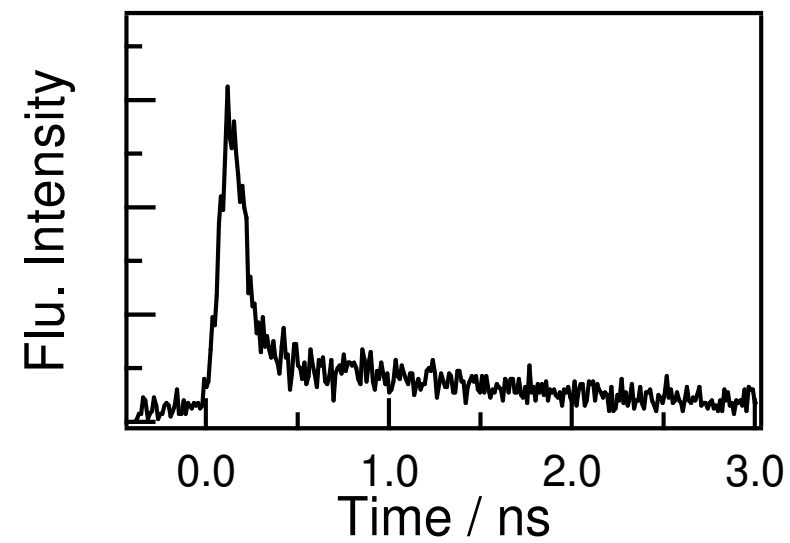

(a) Time resolved spectra of **5** in toluene; (b) Fluorescence time profile of **5** at 700 nm in toluene.  $\lambda_{\text{ex}} = 400$  nm

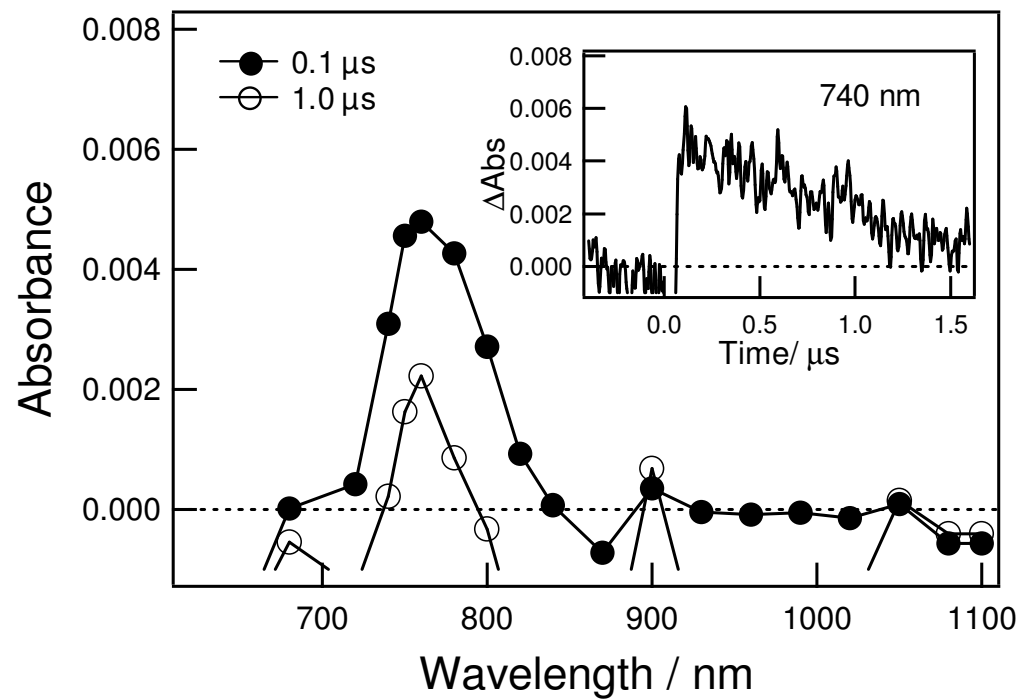

Transient absorption spectra obtained by 532 nm laser light of **5** in PhCN obtained by 532 nm laser light photolysis
